# Supplementary material
Source: ML conference proceedings conference paper supplement (https://openaccess.thecvf.com/content/CVPR2024/html/Li_Self-Supervised_Representation_Learning_CVPR_2024_paper.html)
Supplement: Supplementary file 1 [file Li_Self-Supervised_Representation_Learning_CVPR_2024_supplemental.pdf]

# Appendix: Self-supervised Representation Learning from Arbitrary Scenarios

Anonymous CVPR submission

Paper ID 8033

## 001 1. Evaluation metrics

002 Following common practices, we mainly use the top-1 accuracy  
003 to evaluate the semantic capacity of the pre-trained  
004 model for linear probing and fine-tuning classification task.  
005 Meanwhile, we adopt the box and mask mean average pre-  
006 cision to validate the performance of transfer learning in ob-  
007 ject detection and instance segmentation tasks. Finally, we  
008 adopt the mean intersection of union to verify the transfer  
009 ability of the semantic segmentation task.

## 010 2. Pre-training settings

### 011 2.1. Large-scale settings

012 In experiments of COCO, both ImageNet-100 and COCO,  
013 and ImageNet-1K, for a fair comparison, we follow the set-  
014 tings of MAE [6]. We partition the image of  $224 \times 224$   
015 into  $14 \times 14$  patches with the patch size being  $16 \times 16$ ,  
016 and each patch as an image token. For ViT-Base model, it  
017 has 12 blocks, and each block has 768 feature dimensions  
018 and 12 self-attention heads. The batch size is set as 4096.  
019 Meanwhile, the weight decay,  $\beta_1$  and  $\beta_2$  for AdamW op-  
020 timizer is set to be 0.05, 0.9 and 0.95, respectively. The  
021 warmup epochs is set as 40 epochs and the base learning  
022 rate  $base\_lr = 1.5e^{-4}$ . In the experiment of ASL, the  
023 Transformer layer at the end of the encoder has 768 fea-  
024 ture dimensions and 4 self-attention heads with 0.5 dropout  
025 ratio. For the ablation study and COCO pre-training exper-  
026 iments, we pre-train ASL with 800 epochs on COCO, then  
027 report these results of ImageNet linear probing and COCO  
028 detection. In pre-training experiments on both ImageNet-  
029 100 and COCO, we pre-train ASL with 800 epochs and  
030 4000 epochs. In ImageNet-1K pre-training experiments, we  
031 pre-train the ASL with the same epochs of MAE.

### 032 2.2. Small-scale settings

033 In experiments of CIFAR-10 and CIFAR-100, we adopt  
034 the ViT-Small as the base architecture to verify the effec-  
035 tiveness of ASL in small-scale datasets. ViT-Small is pre-  
036 trained on CIFAR-10 and CIFAR-100 [10]. According to  
037 the prior work [3, 7], ViT-Small has 12 layers. For each  
038 layer, it has 384 feature dimensions and 6 self-attention

heads. In our experiments, we adopt patch size  $4 \times 4$  of  
image region as an image token and split the  $32 \times 32$  im-  
ages into  $8 \times 8$  tokens. For the design of the decoder, its  
attention head and feature dimension are the same as the  
encoder. Besides, we set the decoder for MAE [6] to have  
the same depth, attention head, and dimension as ours. In  
the pre-training process, the batch size is set as 512, and  
weight decay is set as 0.05. The standard random cropping  
and horizontal flipping are used for data augmentation. Fur-  
thermore, we adopt AdamW optimizer [14],  $\beta_1 = 0.9$  and  
 $\beta_2 = 0.999$ .  $base\_lr = 1e^{-3}$  to train the basic backbone,  
and the warmup epochs are set as 10 epochs. These ViT-  
Small models are pre-trained for 1600 epochs. In the exper-  
iment of ASL, the Transformer layer at the end of the en-  
coder has 384 feature dimensions and 4 self-attention heads  
with 0.5 dropout ratio.

## 039 3. The downstream tasks settings of COCO, 040 pre-training on both ImageNet-100 and 041 COCO, and ImageNet-1K

### 042 3.1. The details of linear probing

043 For linear probing, we follow MAE [6] to evaluate the  
044 ImageNet pre-trained models, using the LARS [19] opti-  
045 mizer with momentum 0.9. The model is trained for 90  
046 epochs. The batch size is 16384, the warmup epoch is 10  
047 and the learning rate is 6.4. We adopt an extra BatchNorm  
048 layer [9] without affine transformation (`affine=False`)  
049 before the linear classifier. We set weight decay as zero. For  
050 ablation studies, we train 200 epochs and report the results  
051 of linear probing. The details are described in Table 1.

### 052 3.2. The details of end-to-end finetuning

053 Similarly, we adhere the hyper-parameters of MAE to end-  
054 to-end finetuning. The details are shown as Table 2.

### 055 3.3. The details of object detection and instance seg- 056 mentation

057 By strictly following the training setting of MAE [6, 12],  
058 we train all models with the same simple formula: large-  
059 scale jitter [4], scale range  $([0.1, 2.0])$ , AdamW ( $\beta_1, \beta_2 =$   
060

0.9, 0.999) with half-period cosine learning rate decay, linear warmup 0.25 epochs, and 0.1 drop path regularization. Moreover, the model is trained with 100 epochs and the batch size is set to be 64. Also, the learning rate is  $8e - 5$ , and the weight decay is 0.1.

### 3.4. The details of semantic segmentation

Similarly, we fully follow the training setting of MAE. UperNet framework [18] is adopted as our segmentation method in our experiments. In particular, we use AdamW as the optimizer. The input resolution is set to be  $512 \times 512$ . The batch size is 16 and the layer-wise decay rate is 0.65. The model is end-to-end finetuned for 100 epochs.

## 4. The downstream tasks settings of CIFAR

In experiments of CIFAR-10 and CIFAR-100, the settings of downstream tasks are following as [7].

| config                 | value             |
|------------------------|-------------------|
| optimizer              | LARS [19]         |
| base_lr                | 0.1               |
| weight decay           | 0                 |
| momentum               | 0.9               |
| batch size             | 16384             |
| learning rate schedule | cosine decay [13] |
| warmup epochs [5]      | 10                |
| training epochs        | 90                |
| augmentation           | RandomResizedCrop |

Table 1. Linear probing setting.

| config                 | value                |
|------------------------|----------------------|
| optimizer              | AdamW [14]           |
| base_lr                | 1e-3                 |
| weight decay           | 0.05                 |
| $\beta_1, \beta_2$ [1] | 0.9, 0.999           |
| layer-wise lr decay    | 0.75                 |
| batch size             | 1024                 |
| learning rate schedule | cosine decay         |
| warmup epochs          | 5                    |
| training epochs        | 100                  |
| augmentation           | RandAug (9, 0.5) [2] |
| label smoothing [16]   | 0.1                  |
| mixup [21]             | 0.8                  |
| cutmix [20]            | 1.0                  |
| drop path [8]          | 0.1                  |

Table 2. End-to-end finetuning setting.

## 5. Compared with MAE pre-trained on ImageNet-1K

In order to assess the generalization capability of the ASL in arbitrary scenarios fairly and reasonably, we compared MAE pre-trained on the ImageNet-1K dataset with the ASL model pre-trained on a combination of ImageNet-100 and COCO, specifically examining its performance on the ImageNet-100 dataset. It is noteworthy that both the ImageNet-1K dataset and the mixed ImageNet-100 and COCO dataset share ImageNet-100 as a subset. Therefore, a more equitable and justifiable evaluation method for pre-trained models is to assess their performance on the ImageNet-100 and other datasets, in contrast to directly evaluating them on ImageNet-1K. As depicted in the Table 3, the performance of ASL, pre-trained for approximately 236k iterations, surpasses that of MAE trained for about 499k iterations, all the while utilizing only 70% of the computational load required by MAE. Moreover, the main text shows the performance of ASL outperforms that of MAE on COCO detection, instance segmentation, and ADE20k semantic segmentation. These results not only highlight the adaptability of ASL on arbitrary scenarios but also underscores its efficiency as a more effective algorithm.

## 6. The results of ViT-L

In order to demonstrate the generalization capability of ASL at a larger architecture, we conduct experiments using the ViT-L architecture, and the results are presented in the Table 4. The findings reveal that our approach achieves higher gains when employing a larger network structure.

## 7. The impact of global data augmentation in contrastive learning on MAE

In order to assess the impact of data augmentation previously validated in contrastive learning on MAE, we conducted some experiments in Table 5 using the ImageNet-1K dataset. All experiments were pre-trained for 200 epochs. The results indicate that the employed data augmentations are not conducive to improving MAE. These augmentations, implemented at a global level, prove impractical for MAE with patch-level learning. These experimental findings inspire us to propose patch-level feature enhancement as opposed to conventional global-level data augmentation for self-supervised learning.

## 8. Pre-training on OpenImages dataset

Here we provide 800-epoch results on OpenImages[11]. Its ImageNet-100 linear evaluation, object detection, and semantic segmentation are 87.6%, 51.7%, and 49.7%, outperforming the performance of MAE (83.5%, 49.9%, and 47.8%).

| Method  | Pre-train data      | Iterations  | Epochs | FLOPs             | LP           | FT           |
|---------|---------------------|-------------|--------|-------------------|--------------|--------------|
| MAE [6] | ImageNet-1K         | $\sim 249k$ | 800    | $1 \times$        | 80.5%        | 92.7%        |
| MAE [6] | ImageNet-1K         | $\sim 499k$ | 1600   | $2 \times$        | 85.3%        | 93.1%        |
| ASL     | ImageNet-100 + COCO | $\sim 236k$ | 4000   | $\sim 1.4 \times$ | <b>85.9%</b> | <b>94.2%</b> |

Table 3. **ImageNet-100 Top-1 accuracy of different methods under linear probing (LP) and fine-tuning (FT) setting.** We report top-1 accuracy on the ImageNet-100 val set. All of these methods adopt ViT-B.

| Method | Pre-train data      | Epochs | Arch. | LP    | FT    |
|--------|---------------------|--------|-------|-------|-------|
| ASL    | ImageNet-100 + COCO | 800    | ViT-B | 79.6% | 92.4% |
| ASL    | ImageNet-100 + COCO | 800    | ViT-L | 85.1% | 93.7% |

Table 4. **ImageNet-100 Top-1 accuracy of different methods under linear probing (LP) and fine-tuning (FT) setting.** We report top-1 accuracy on the ImageNet-100 val set.

| augmentation   | Linear probing |
|----------------|----------------|
| baseline       | 58.8%          |
| + colorjitter  | 57.6%          |
| + grayscale    | 57.4%          |
| + gaussianblur | 58.2%          |
| + solarize     | 55.8%          |

Table 5. **The impact of global data augmentation in contrastive learning on MAE.** We report top-1 accuracy on ImageNet-1K based on linear probing. All of these methods adopt ViT-B architecture.

## 9. Loss coefficient

The loss coefficient for  $\mathcal{L}_{SEM}$  under AEE setting is set to 0.1, 0.5, 1, and 2, and the corresponding linear evaluation results of 47.0%, 48.0%, 48.6%, and 47.3%.

## 10. Runtime comparison between iBOT and ASL

Based on a batchsize of 32 for ViT-B, ASL achieves an iteration time of 0.2 s on V100 while iBoT is 1.6 s, despite iBoT having only 4 times FLOPs of ASL. According to our design, ASL’s dual-branch features share the same model, enabling parallel computation for accelerated processing and allowing all features to be forwarded in a single pass. In contrast, hybrid methods like iBoT typically involve two models (student model and teacher model), leading to sequential computation. Specifically, after the forward computation of the student model is completed, the teacher model is then invoked, resulting not only in increased FLOPs but also longer processing times. We will add the time comparison.

## 11. Explanation of Tables in main text

Tables 1-4 constitute a comprehensive comparison which is divided into two parts. The first part (Tables 1 and 2) involves the comparison on the same dataset. The second part (Tables 3 and 4) comprises the comparison on the best performance, where we compare our ASL with other methods pre-trained on their favorite datasets according to their respective papers. The results show that ASL consistently achieves the SOTA in both cases. More discussions are also described in lines 417-445 (part 1) and 485-495 (part 2).

## 12. The detailed derivation

The MSE is equivalent to Eq(1), where  $C$  is a constant and equal to  $p(x_{m_i})$ .

$$\begin{aligned}
\mathcal{L}_{single}(i) &= -\log p(x_{m_i} | x_{inputs}, \theta, \xi) \\
&\cong -\log p(x_{m_i} | x_{inputs}, \theta, \xi) + \log C \\
&= -\log p(x_{m_i} | x_{inputs}, \theta, \xi) + \log 1 + \log C \\
&= -\log \mathcal{N}(x_{m_i}; x_{p_i}, \sigma_{noise}^2 \mathbf{I}) + \log 1 + \log C \\
&= -\log \mathcal{N}(x_{m_i}; x_{p_i}, \sigma_{noise}^2 \mathbf{I}) \\
&+ \log \int \mathcal{N}(x_{m_i}; x_{p_i}, \sigma_{noise}^2 \mathbf{I}) dx_{m_i} + \log C \\
&= -\log \mathcal{N}(x_{m_i}; x_{p_i}, \sigma_{noise}^2 \mathbf{I}) \\
&+ \log \int \mathcal{N}(x_{m_i}; x_{p_i}, \sigma_{noise}^2 \mathbf{I}) \cdot C dx_{m_i} \\
&= -\log \mathcal{N}(x_{m_i}; x_{p_i}, \sigma_{noise}^2 \mathbf{I}) \\
&+ \log \int \mathcal{N}(x_{m_i}; x_{p_i}, \sigma_{noise}^2 \mathbf{I}) \cdot p(x_{m_i}) dx_{m_i}
\end{aligned} \tag{1}$$

For the second part of Eq(1), we utilize monte carlo method to solve  $p(x_{m_i})$  and can obtain the Eq(2).

$$\begin{aligned}
&\int \mathcal{N}(x_{m_i}; x_{p_i}, \sigma_{noise}^2 \mathbf{I}) \cdot p(x_{m_i}) dx_{m_i} \\
&= \int_{x_{m_i} \sim p(m_i)} \mathcal{N}(x_{m_i}; x_{p_i}, \sigma_{noise}^2 \mathbf{I}) \\
&\approx \frac{1}{N} \sum_{b=1}^N \mathcal{N}(x_{m_i(b)}; x_{p_i}, \sigma_{noise}^2 \mathbf{I}),
\end{aligned} \tag{2}$$

175 The monte carlo method treats all pseudo labels  
176 in a training batch as random samples from  $p(x_{m_i})$ .  
177 Hence, for pseudo labels in a training batch  $B =$   
178  $\{x_{m_{i(1)}}, x_{m_{i(2)}}, \dots, x_{m_{i(N)}}\}$ , the loss is defined as Eq(3),  
179 where  $\lambda = 2\sigma_{noise}^2$  is a temperature coefficient.

$$\begin{aligned} \mathcal{L}_{single}(i) &= -\log \mathcal{N}(x_{m_i}; x_{p_i}, \sigma_{noise}^2 \mathbf{I}) \\ &+ \log \int \mathcal{N}(x_{m_i}; x_{p_i}, \sigma_{noise}^2 \mathbf{I}) \cdot p(x_{m_i}) dx_{m_i} \\ &\cong -\log \mathcal{N}(x_{m_i}; x_{p_i}, \sigma_{noise}^2 \mathbf{I}) \\ &+ \log \int \sum_{b=1}^N \mathcal{N}(x_{m_{i(b)}}; x_{p_i}, \sigma_{noise}^2 \mathbf{I}) \\ &= -\log \frac{\exp(-\|x_{p_i} - x_{m_i}\|^2/\lambda)}{\sum_{x'_{m_i} \in B} \exp(-\|x_{p_i} - x'_{m_i}\|^2/\lambda)}, \end{aligned} \quad (3)$$

### 181 13. The proof of maximizing likelihood estima- 182 tion is equivalent to minimize MSE

183 For the likelihood estimation, it can be expressed as below  
184 with the function  $L$  where  $\theta$  is the model,  $i$  is the index for  
185 the sample, and  $f$  is the probability density function:

$$186 L(\theta) = \prod_i f(x^i | \mu, \sigma^2) \quad (4)$$

187 The probability density function  $f$  for a Gaussian:

$$188 f(x) = \frac{1}{\sigma\sqrt{2\pi}} e^{-\frac{(x-\mu)^2}{2\sigma^2}} \quad (5)$$

189 For maximum likelihood estimation, the  $y$  is the label,  
190 and  $y_p$  is the prediction by the model, the training stage  
191 of the model is modeled as the Gaussian distribution  $y \sim$   
192  $\mathcal{N}(y_p, \sigma^2 I)$ , that is, the prediction is considered as the mean  
193 of a noisy prediction distribution:

$$\begin{aligned} \operatorname{argmax}_i \prod_i f(y^i | y_p^i, \sigma^2) &= \operatorname{argmax}_i \prod_i f(y^i | y_p^i, \sigma^2) \\ &= \operatorname{argmax}_i \prod_i f(y^i | y_p^i, \sigma^2) \\ &= \operatorname{argmax}_i \prod_i \frac{1}{\sigma\sqrt{2\pi}} e^{-\frac{(y^i - y_p^i)^2}{2\sigma^2}} \\ &\cong \log(\operatorname{argmax}_i \prod_i \frac{1}{\sigma\sqrt{2\pi}} e^{-\frac{(y^i - y_p^i)^2}{2\sigma^2}}) \end{aligned} \quad (6)$$

194 The log maximum likelihood estimation:  
195

$$\begin{aligned} \log(\operatorname{argmax}_i \prod_i \frac{1}{\sigma\sqrt{2\pi}} e^{-\frac{(y^i - y_p^i)^2}{2\sigma^2}}) &\propto \operatorname{argmax}_i \sum_i -\frac{(y^i - y_p^i)^2}{2\sigma^2} \\ &\propto \operatorname{argmin}_i \sum_i (y^i - y_p^i)^2 \end{aligned} \quad (7)$$

196

From the above, it can be observed that maximizing like-  
197 lihood estimation is equivalent to minimize MSE. 198

## 199 14. Limitations

We have not extended ASL to larger datasets [15, 17, 22]  
200 and larger architectures (e.g., ViT-H) due to the resource  
201 and time consumption. 202

## References 203

- [1] Mark Chen, Alec Radford, Rewon Child, Jeffrey K Wu, Hee-  
204 woo Jun, David Luan, and Ilya Sutskever. Generative pre-  
205 training from pixels. In *International Conference on Ma-*  
206 *chine Learning*, pages 1691–1703, 2020. 207
- [2] Ekin D Cubuk, Barret Zoph, Jonathon Shlens, and Quoc V  
208 Le. Randaugment: Practical data augmentation with no sep-  
209 arate search. *arXiv preprint arXiv:1909.13719*, 2019. 210
- [3] Alexey Dosovitskiy, Lucas Beyer, Alexander Kolesnikov,  
211 Dirk Weissenborn, Xiaohua Zhai, Thomas Unterthiner,  
212 Mostafa Dehghani, Matthias Minderer, Georg Heigold, Syl-  
213 vain Gelly, Jakob Uszkoreit, and Neil Houlsby. An image is  
214 worth 16x16 words: Transformers for image recognition at  
215 scale. In *International Conference on Learning Representa-*  
216 *tions*, 2021. 217
- [4] Golnaz Ghiasi, Yin Cui, Aravind Srinivas, Rui Qian, Tsung-  
218 Yi Lin, Ekin D Cubuk, Quoc V Le, and Barret Zoph. Simple  
219 copy-paste is a strong data augmentation method for instance  
220 segmentation. In *Proceedings of the IEEE conference on*  
221 *computer vision and pattern recognition*, pages 2918–2928,  
222 2021. 223
- [5] Priya Goyal, Piotr Dollár, Ross Girshick, Pieter Noord-  
224 huis, Lukasz Wesolowski, Aapo Kyrola, Andrew Tulloch,  
225 Yangqing Jia, and Kaiming He. Accurate, large mini-  
226 batch sgd: Training imagenet in 1 hour. *arXiv preprint*  
227 *arXiv:1706.02677*, 2017. 228
- [6] Kaiming He, Xinlei Chen, Saining Xie, Yanghao Li, Piotr  
229 Dollár, and Ross Girshick. Masked autoencoders are scalable  
230 vision learners. *arXiv preprint arXiv:2111.06377*, 2021. 231
- [7] Tianyu Hua, Yonglong Tian, Sucheng Ren, Hang Zhao,  
232 and Leonid Sigal. Self-supervision through random seg-  
233 ments with autoregressive coding (randsac). *arXiv preprint*  
234 *arXiv:2203.12054*, 2022. 235
- [8] Gao Huang, Yu Sun, Zhuang Liu, Daniel Sedra, and Kil-  
236 ian Q Weinberger. Deep networks with stochastic depth. In  
237 *European conference on computer vision*, pages 646–661.  
238 Springer, 2016. 239
- [9] Sergey Ioffe and Christian Szegedy. Batch normalization:  
240 Accelerating deep network training by reducing internal co-  
241 variate shift. In *International Conference on Machine Learn-*  
242 *ing*, 2015. 243
- [10] Alex Krizhevsky, Geoffrey Hinton, et al. Learning multiple  
244 layers of features from tiny images. 2009. 245
- [11] Alina Kuznetsova, Hassan Rom, Neil Alldrin, Jasper Uij-  
246 jlings, Ivan Krasin, Jordi Pont-Tuset, Shahab Kamali, Stefan  
247 Popov, Matteo Mallocci, Alexander Kolesnikov, et al. The  
248 open images dataset v4: Unified image classification, object  
249

- 250 detection, and visual relationship detection at scale. *International Journal of Computer Vision*, 128(7):1956–1981, 2020.  
251  
252 2
- 253 [12] Yanghao Li, Saining Xie, Xinlei Chen, Piotr Dollar, Kaiming  
254 He, and Ross Girshick. Benchmarking detection  
255 transfer learning with vision transformers. *arXiv preprint*  
256 *arXiv:2111.11429*, 2021. 1
- 257 [13] Ilya Loshchilov and Frank Hutter. Sgdr: Stochastic  
258 gradient descent with warm restarts. *arXiv preprint*  
259 *arXiv:1608.03983*, 2016. 2
- 260 [14] Ilya Loshchilov and Frank Hutter. Decoupled weight decay  
261 regularization. *arXiv preprint arXiv:1711.05101*, 2017. 1, 2
- 262 [15] Chen Sun, Abhinav Shrivastava, Saurabh Singh, and Abhi-  
263 nav Gupta. Revisiting unreasonable effectiveness of data in  
264 deep learning era. In *Proceedings of the IEEE international*  
265 *conference on computer vision*, pages 843–852, 2017. 4
- 266 [16] Christian Szegedy, Vincent Vanhoucke, Sergey Ioffe, Jon  
267 Shlens, and Zbigniew Wojna. Rethinking the inception archi-  
268 tecture for computer vision. In *Proceedings of the IEEE con-*  
269 *ference on computer vision and pattern recognition*, pages  
270 2818–2826, 2016. 2
- 271 [17] Bart Thomee, David A Shamma, Gerald Friedland, Ben-  
272 jamin Elizalde, Karl Ni, Douglas Poland, Damian Borth, and  
273 Li-Jia Li. Yfcc100m: The new data in multimedia research.  
274 *Communications of the ACM*, 59(2):64–73, 2016. 4
- 275 [18] Tete Xiao, Yingcheng Liu, Bolei Zhou, Yuning Jiang, and  
276 Jian Sun. Unified perceptual parsing for scene understand-  
277 ing. In *Proceedings of the European Conference on Com-*  
278 *puter Vision*, pages 418–434, 2018. 2
- 279 [19] Yang You, Igor Gitman, and Boris Ginsburg. Large  
280 batch training of convolutional networks. *arXiv preprint*  
281 *arXiv:1708.03888*, 2017. 1, 2
- 282 [20] Sangdoon Yun, Dongyoon Han, Seong Joon Oh, Sanghyuk  
283 Chun, Junsuk Choe, and Youngjoon Yoo. Cutmix: Regu-  
284 larization strategy to train strong classifiers with localizable  
285 features. In *Proceedings of the IEEE/CVF international con-*  
286 *ference on computer vision*, pages 6023–6032, 2019. 2
- 287 [21] Hongyi Zhang, Moustapha Cisse, Yann N Dauphin, and  
288 David Lopez-Paz. mixup: Beyond empirical risk minimiza-  
289 tion. *arXiv preprint arXiv:1710.09412*, 2017. 2
- 290 [22] Bolei Zhou, Agata Lapedriza, Aditya Khosla, Aude Oliva,  
291 and Antonio Torralba. Places: A 10 million image database  
292 for scene recognition. *IEEE transactions on pattern analysis*  
293 *and machine intelligence*, 40(6):1452–1464, 2017. 4
